# Supplementary material for: Mass and ionic composition of atmospheric fine particles over Belgium and their relation with gaseous air pollutants
Source: Royal Society of Chemistry journal article supplement (doi:10.1039/b805157g), 2008-01-01
Supplement: b805157g.pdf [file b805157g.pdf]

**Supplementary Table and Figures**

Table S1: indicative Gantt chart of sampling period at various locations.

| <i>Location</i> | 2001    |          |       |       |     |      |      |        |           |         |          |          | 2002    |          |       |       |     |      |      |        |           |         |          |          | 2003    |          |       |       |     |      |      |        |           |         |          |          |  |
|-----------------|---------|----------|-------|-------|-----|------|------|--------|-----------|---------|----------|----------|---------|----------|-------|-------|-----|------|------|--------|-----------|---------|----------|----------|---------|----------|-------|-------|-----|------|------|--------|-----------|---------|----------|----------|--|
|                 | January | February | March | April | May | June | July | August | September | October | November | December | January | February | March | April | May | June | July | August | September | October | November | December | January | February | March | April | May | June | July | August | September | October | November | December |  |
| Petroleumkaai   |         |          |       |       |     |      |      |        |           |         |          |          |         |          |       |       |     |      |      |        |           |         |          |          |         |          |       |       |     |      |      |        |           |         |          |          |  |
| Borgerhout      |         |          |       |       |     |      |      |        |           |         |          |          |         |          |       |       |     |      |      |        |           |         |          |          |         |          |       |       |     |      |      |        |           |         |          |          |  |
| Zelzate         |         |          |       |       |     |      |      |        |           |         |          |          |         |          |       |       |     |      |      |        |           |         |          |          |         |          |       |       |     |      |      |        |           |         |          |          |  |
| Hasselt         |         |          |       |       |     |      |      |        |           |         |          |          |         |          |       |       |     |      |      |        |           |         |          |          |         |          |       |       |     |      |      |        |           |         |          |          |  |
| Mechelen        |         |          |       |       |     |      |      |        |           |         |          |          |         |          |       |       |     |      |      |        |           |         |          |          |         |          |       |       |     |      |      |        |           |         |          |          |  |
| Wingene         |         |          |       |       |     |      |      |        |           |         |          |          |         |          |       |       |     |      |      |        |           |         |          |          |         |          |       |       |     |      |      |        |           |         |          |          |  |

Supplementary Table S2: Daily average values of the meteorological parameters with standard deviation ( $\pm$ SD) for each site and campaign

| Parameter             | Petroleumkaai  |               | Borgerhout    |               | Zelzate       |               | Hasselt       |                | Wingene        |                | Mechelen       |               |
|-----------------------|----------------|---------------|---------------|---------------|---------------|---------------|---------------|----------------|----------------|----------------|----------------|---------------|
|                       | C1             | C2            | C1            | C2            | C1            | C2            | C1            | C2             | C1             | C2             | C1             | C2            |
| Temperature (°C)      | 14.9 $\pm$ 1.8 | 4.5 $\pm$ 4.6 | 6.9 $\pm$ 3.2 | 7.1 $\pm$ 3.9 | 3.2 $\pm$ 3.6 | 17 $\pm$ 3    | 8.2 $\pm$ 3.0 | 11.5 $\pm$ 2.1 | 10.2 $\pm$ 2.5 | 17.2 $\pm$ 2.6 | 17.1 $\pm$ 2.6 | 6.2 $\pm$ 4.2 |
| Air pressure (hPa)    | 1014 $\pm$ 7   | 1013 $\pm$ 13 | 1024 $\pm$ 11 | 1024 $\pm$ 8  | 1022 $\pm$ 13 | 1018 $\pm$ 5  | 1010 $\pm$ 9  | 1013 $\pm$ 10  | 1016 $\pm$ 9   | 1014 $\pm$ 5   | 1014 $\pm$ 7   | 1012 $\pm$ 11 |
| Precipitation (mm)    | 3.0 $\pm$ 6.0  | 3.5 $\pm$ 5.9 | 2.7 $\pm$ 4.7 | 0.9 $\pm$ 2.8 | 1.8 $\pm$ 3.5 | 1.0 $\pm$ 2.4 | 3.2 $\pm$ 4.3 | 2.1 $\pm$ 3.0  | 1.3 $\pm$ 2.3  | 2.2 $\pm$ 5.0  | 2.1 $\pm$ 5.1  | 2.6 $\pm$ 4.0 |
| Relative humidity (%) | 72 $\pm$ 5     | 73 $\pm$ 7    | 75 $\pm$ 5    | 59 $\pm$ 10   | 81 $\pm$ 25   | 84 $\pm$ 7    | 67 $\pm$ 7    | 70 $\pm$ 6     | 73 $\pm$ 10    | 79 $\pm$ 7     | 60 $\pm$ 6     | 74 $\pm$ 7    |
| Wind speed (m/s)      | 3.9 $\pm$ 1.4  | 4.4 $\pm$ 1.4 | 3.6 $\pm$ 1.6 | 3.4 $\pm$ 1.3 | 5.5 $\pm$ 2.6 | 3.3 $\pm$ 1.2 | 5.5 $\pm$ 2.1 | 4.0 $\pm$ 1.9  | 4.1 $\pm$ 1.8  | 3.6 $\pm$ 1.1  | 3.7 $\pm$ 0.9  | 3.8 $\pm$ 1.4 |
| Wind direction*       | SW             | SW            | SW            | E/SE          | SW            | N/NE          | SW            | SW             | SW             | SW             | SW             | E/W/SW        |

\* The prevailing wind directions are indicated.
